# Supplementary material for: Scanning electrochemical probe microscopy: towards the characterization of micro- and nanostructured photocatalytic materials
Source: Royal Society of Chemistry journal article supplement (doi:10.1039/d4fd00136b), 2024-07-15
Supplement: d4fd00136b1.pdf [file d4fd00136b1.pdf]

## Supporting Information

### Scanning electrochemical probe microscopy: towards the characterization of micro- and nanostructured photocatalytic materials

Giada Caniglia\*, Sarah Horn, Christine Kranz\*

*Institute of Analytical and Bioanalytical Chemistry, Ulm University, Albert-Einstein-Allee, 11 89081 Ulm, Germany.*

E-mail: christine.kranz@uni-ulm.de, giada.caniglia@uni-ulm.de

#### Table of contents

**Fig. S1.** Schematics of the influence of size and location of the Pt-B deposition on the cantilever – sample set-up.

**Fig. S2.** SEM image of the cross-section of a Pt-B AFM-SECM probe fabricated *via* pulsed deposition of Pt-B on an Au-recessed disk electrode (diameter: 250 nm).

**Fig. S3.** Cyclic voltammograms of Pt-B modified AFM-SECM probes in sulfuric acid.

**Fig. S4.** SEM and corresponding EDX images of the Pt@Si substrate.

**Fig. S5.** Current map recorded at the Pt@Si substrate under dark conditions using a Pt-B AFM-SECM probe immersed in 0.1 M PBS at pH 4.

**Fig. S6.** Cyclic voltammogram of a Pt-B modified microelectrode in sulfuric acid.

**Fig. S7.** Calibration curves recorded at Pt-B modified microelectrodes.

**Fig. S8.** Cyclic voltammograms of a Pt-B modified microelectrode and a bare Pt microelectrode.

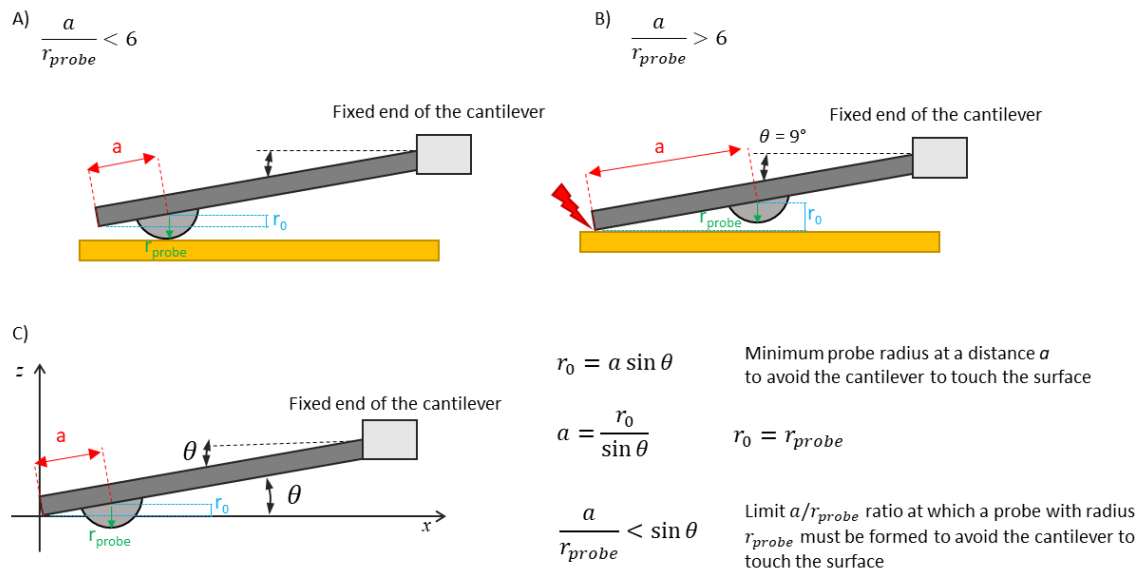

**Fig. S1.** (A-B) Schematics of the side view cantilever-sample set-up. (A) The probe with a radius  $r_{probe}$  is positioned at a distance close to the leading edge of the cantilever, so the probe is touching the surface and not the edge of the cantilever. (B) The probe is positioned at a distance too far from the edge of the cantilever, so that the cantilever touches the surface instead of the probe. (C) Schematic of the geometry of a typical cantilever-sample setup highlighting (i) the angle at which the cantilever is mounted within the holder of the AFM,  $\theta$ ; (ii) the distance between the probe and the leading edge of the cantilever,  $a$ , and (iii) maximum radius,  $r_0$ , of a probe positioned at a distance  $a$  to avoid that the leading edge of the cantilever touches the surface.  $r_{probe}$  denotes the actual radius of the probe.

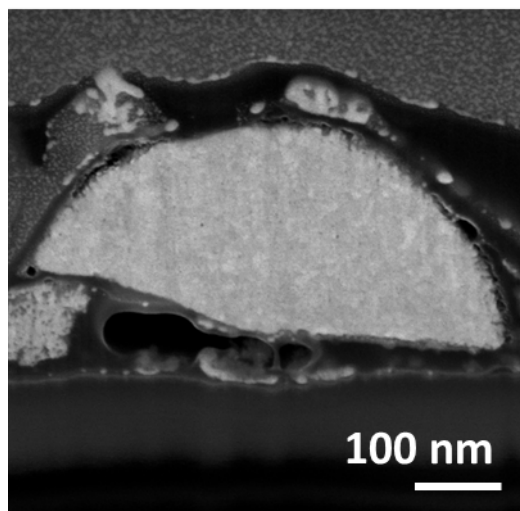

**Fig. S2.** SEM image of the cross-section of a hemispherical Pt-B probe obtained by pulsed electrodeposition of Pt-B onto a 250-nm-diameter recessed Au disk electrode. The probe was embedded in epoxy resin using a micromanipulator in combination with an inverted microscope prior to FIB cross sectioning to minimize beam-induced damage, as previously reported.<sup>1,2</sup>

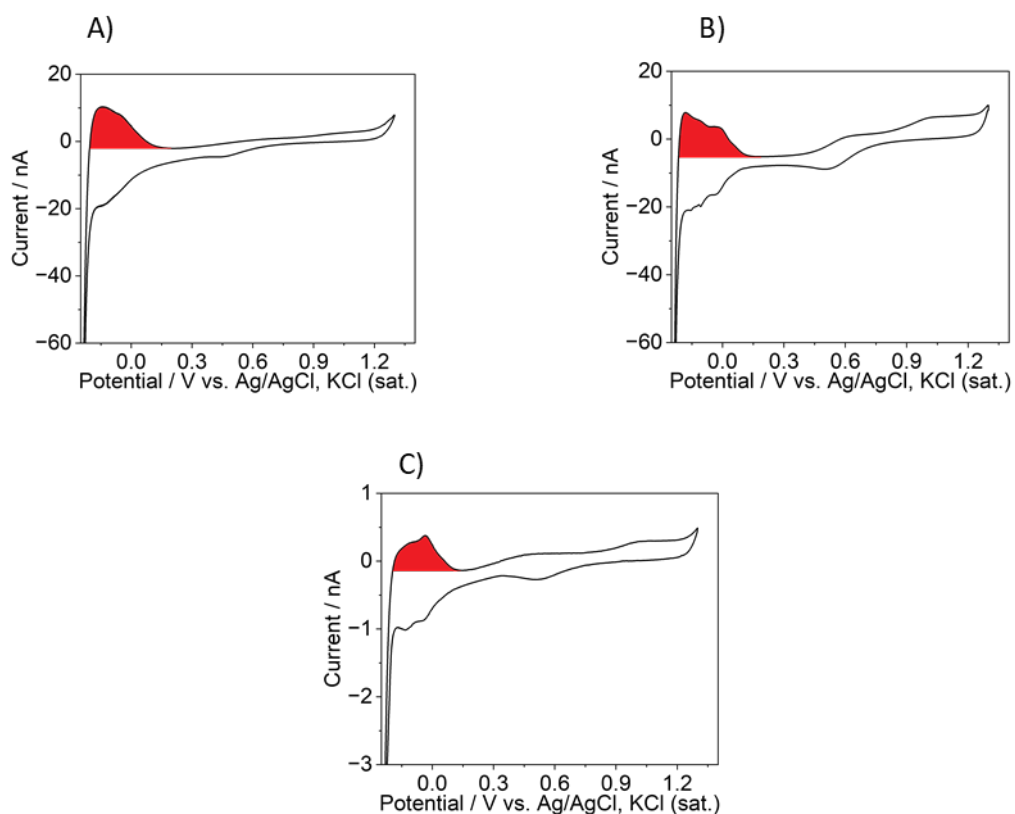

**Fig. S3.** Cyclic voltammograms recorded at Pt-B modified AFM-SECM probes in 0.5 M H<sub>2</sub>SO<sub>4</sub>. (A) Diameter of the original recessed Au disk electrode: 500 nm. Scan rate: 500 mV/s (vs. Ag/AgCl, KCl (sat.)). (B) Diameter of the original recessed Au disk electrode: 1 μm. Scan rate: 400 mV/s (vs. Ag/AgCl, KCl (sat.)). (C) Diameter of the original recessed Au disk electrode: 250 nm. Scan rate: 500 mV/s (vs. Ag/AgCl, KCl (sat.)).

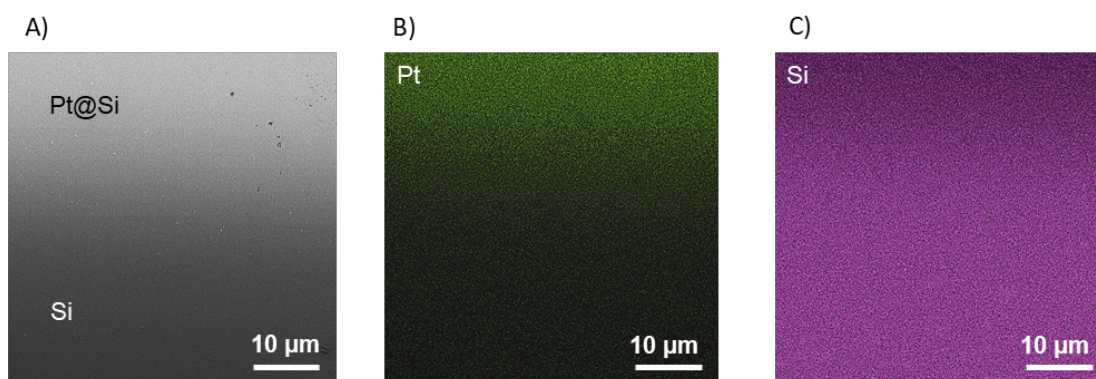

**Fig. S4.** (A) SEM image and (B-C) corresponding colored-coded EDX images of platinum (B) and silicon (C) of the Pt@Si substrate recorded at the border area.

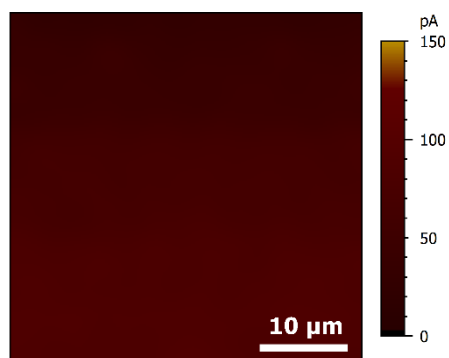

**Fig. S5.** Current map recorded at the Pt@Si substrate using a Pt-B AFM-SECM probe immersed in 0.1 M PBS at pH 4. ( $E_{\text{probe}} = -0.15$  V vs. Ag/AgCl;  $E_{\text{substrate}} =$  open circuit potential).

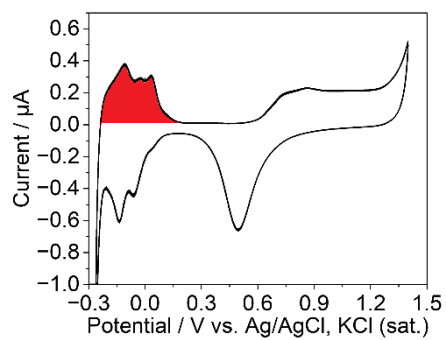

**Fig. S6.** CV recorded at a Pt-B modified microelectrode ( $d = 25$   $\mu\text{m}$ ) in 0.5 M  $\text{H}_2\text{SO}_4$ . Scan rate: 500 mV/s (vs. Ag/AgCl, KCl (sat.)).

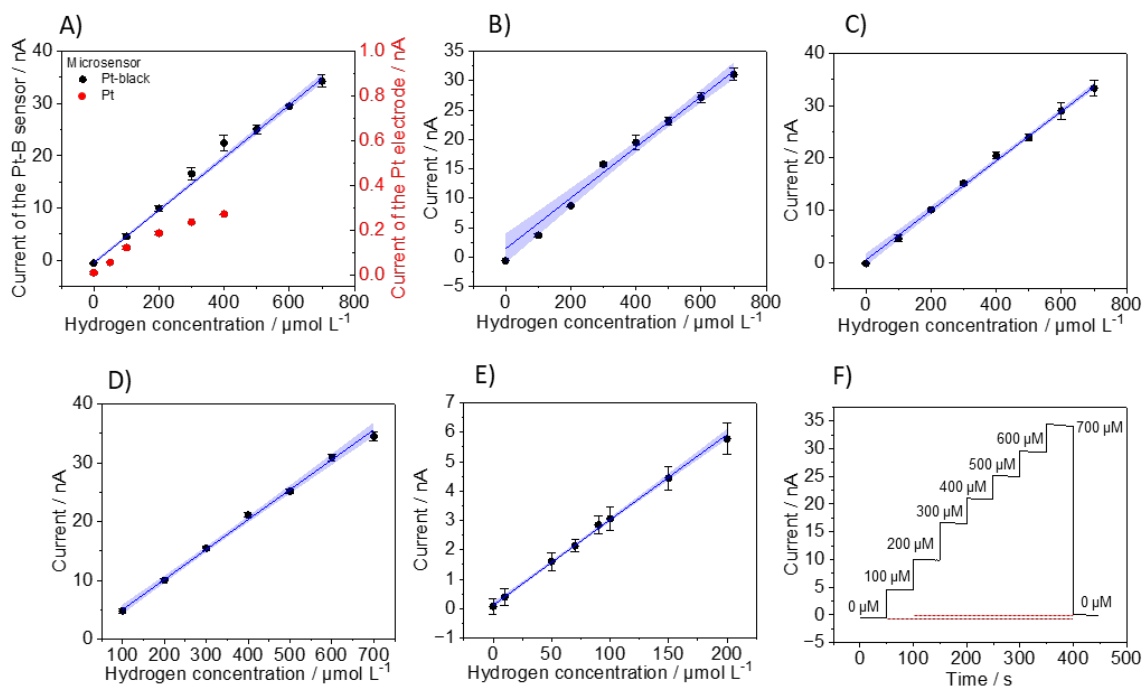

**Fig. S7.** (A-E) Calibration curves (blue line) of H<sub>2</sub> recorded at Pt-B microelectrodes (d = 25 μm) with increased H<sub>2</sub> concentrations immersed in (A) 0.1 M PBS at pH equal to 4 ( $E_{UME} = -0.15$  V vs. Ag/AgCl); (B) 0.1 M PBS at pH equal to 7 ( $E = -0.20$  V vs. Ag/AgCl); (C) 0.1 M PBS at pH equal to 10 ( $E = -0.28$  V vs. Ag/AgCl); (D) 0.1 M ascorbic acid (pH 4,  $E_{UME} = -0.05$  V vs. Ag/AgCl), and (E) 10 % v/v TEOA in 0.1 M HK<sub>2</sub>PO<sub>4</sub> (pH 10,  $E_{UME} = -0.47$  V vs. Ag/AgCl). The blue area denotes the uncertainty range, and the error bars reflect three repetitive measurements. (F) Exemplary chronoamperometry with consecutive increments of H<sub>2</sub> at Pt-B ME (-0.05 V vs. Ag/AgCl) in ascorbic acid 0.1 M (pH 4).

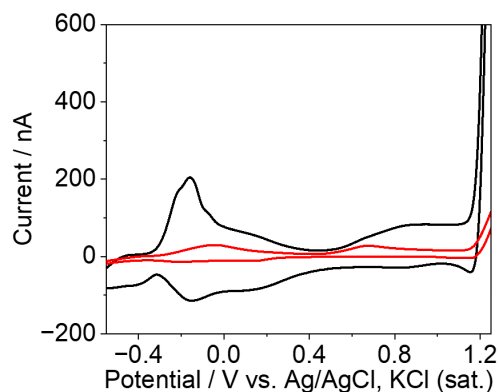

**Fig. S8.** Cyclic voltammograms recorded at a Pt-B modified microelectrode (d = 25 μm; black line) and a bare Pt electrode (d = 25 μm; red line) in 0.1 M PBS at pH.

## References

- 1 T. Philipp, G. Neusser, E. Abouzari-Lotf, S. Shakouri, F. D. H. Wilke, M. Fichtner, M. Ruben, M. Mundsinger, J. Biskupek, U. Kaiser, P. Scheitenberger, M. Lindén and C. Kranz, *J Power Sources*, 2022, **522**, 231002.
- 2 A. Hellmann, G. Neusser, S. Daboss, M. M. Elnagar, J. Liessem, D. Mitoraj, R. Beranek, S. Arbault and C. Kranz, *Analytical Chemistry*, 2024, **96**, 3308–3317.
